# Supplementary material for: Three-dimensional acoustic sub-diffraction focusing by coiled metamaterials with strong absorption
Source: Royal Society of Chemistry journal article supplement (doi:10.1039/c9tc01243e), 2019-01-01
Supplement: c9tc01243e1.pdf [file c9tc01243e1.pdf]

Supplementary materials

## Three-dimensional sub-diffraction focusing by coiled metamaterials with strong absorption

Fuyin Ma\*, Jianyu Chen, Jiu Hui Wu

*School of Mechanical Engineering, Xi'an Jiaotong University, Xi'an 71009, China*

### Supplementary Figures

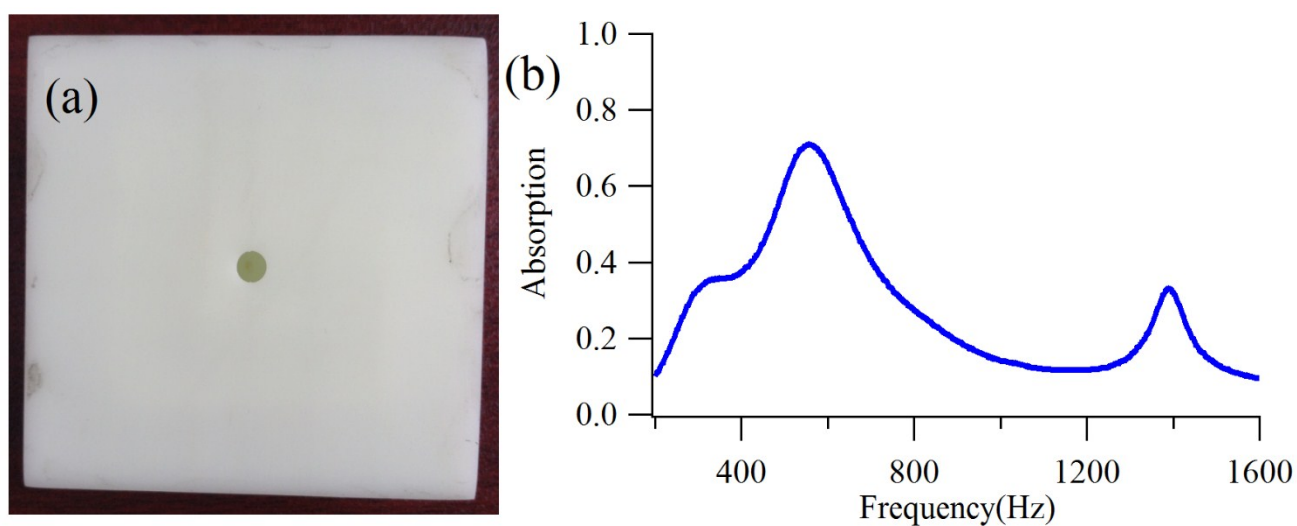

**Supplementary Figure 1. The perforated coplanar spiral sample with single-hole and its sound absorption coefficient.** (a) Single-hole sample fabricated by 3D printing. (b) Sound absorption coefficient measurement results.

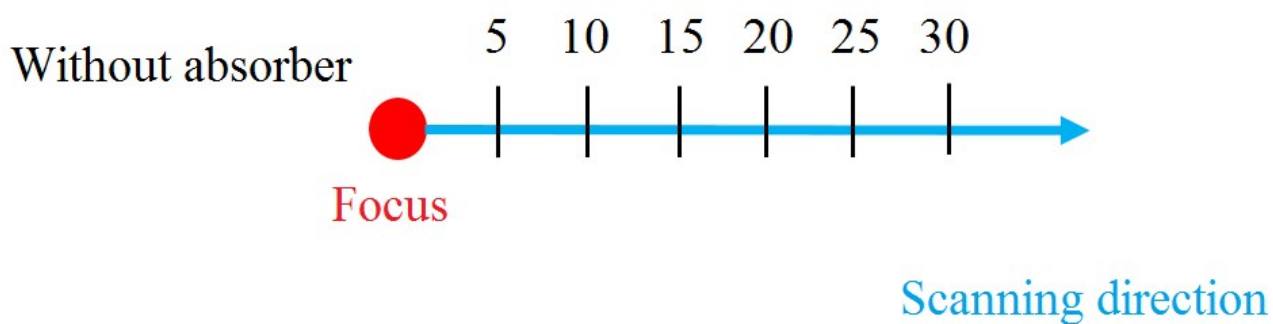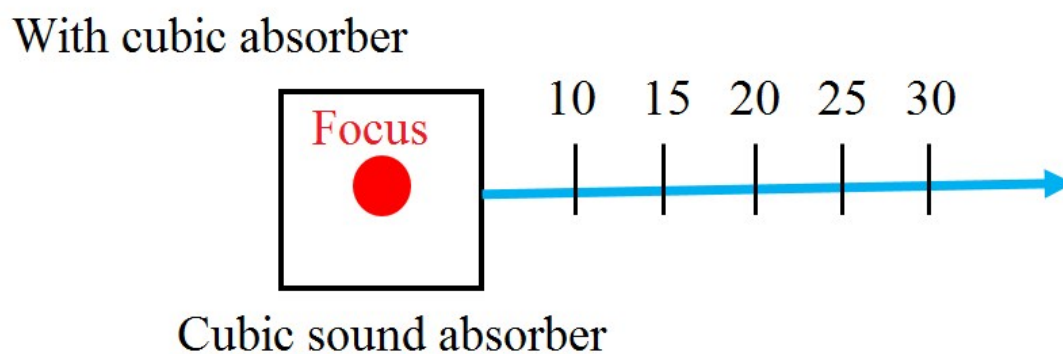

**Supplementary Figure 2.** Schematic diagram of the linear sweeping measurement for the cases without absorber and with a cubic absorber.

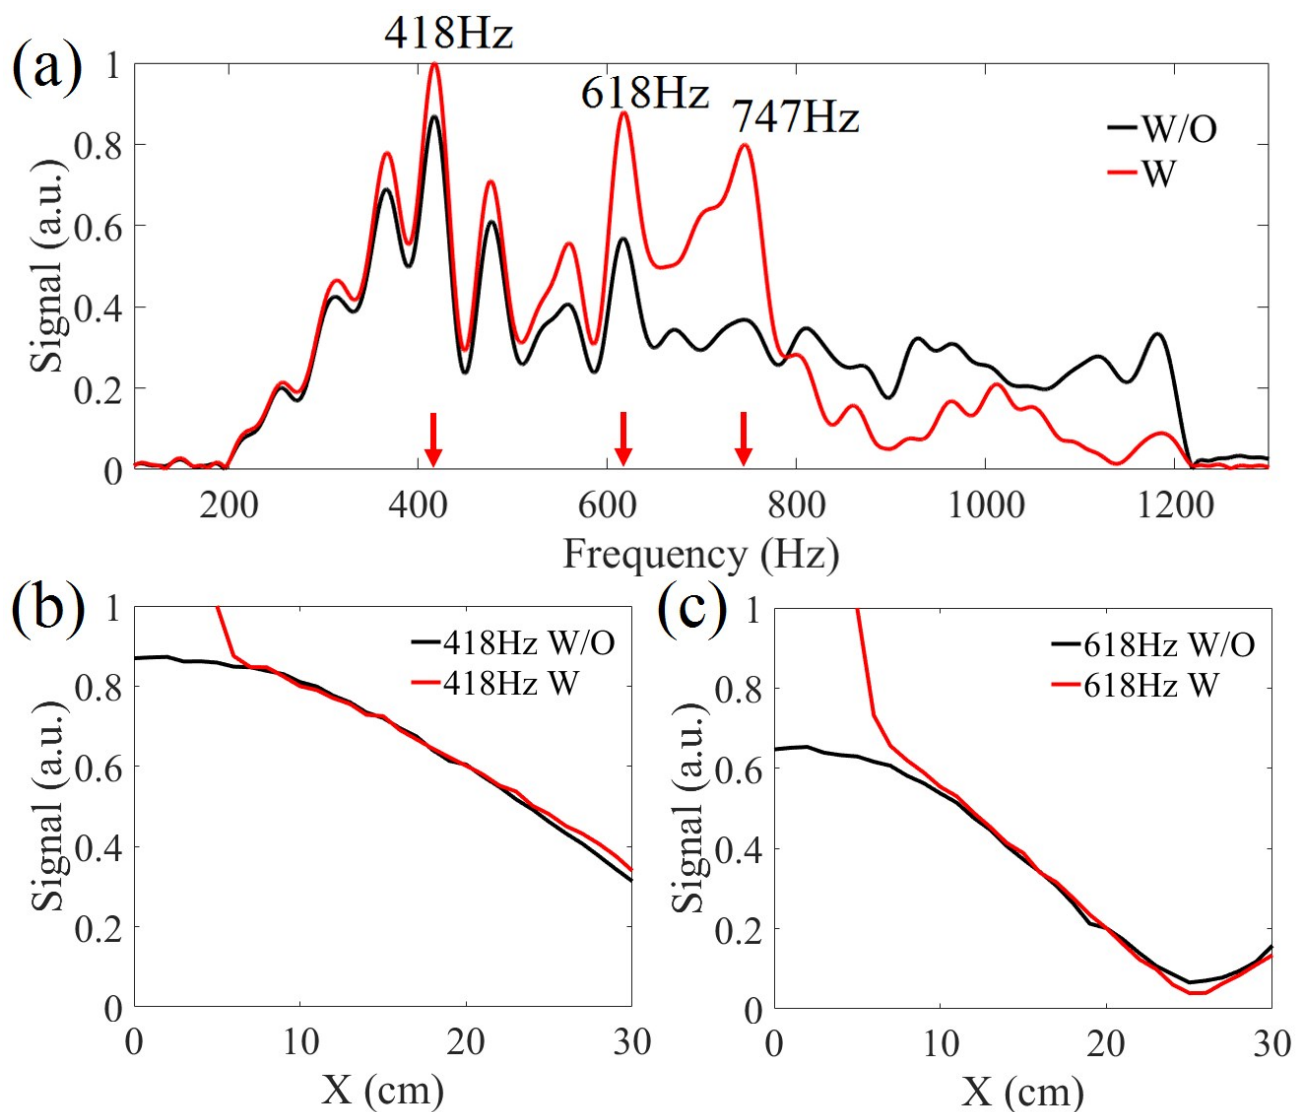

**Supplementary Figure 3. Spectral of cases with/without Ball-1 sample and focusing effect.** (a) Spectral of the focus center (without sample) and the sample surface (with Ball-1 sample) for cases with or without sound absorber. The focusing effect at the first (b) and second (c) spectral peaks.

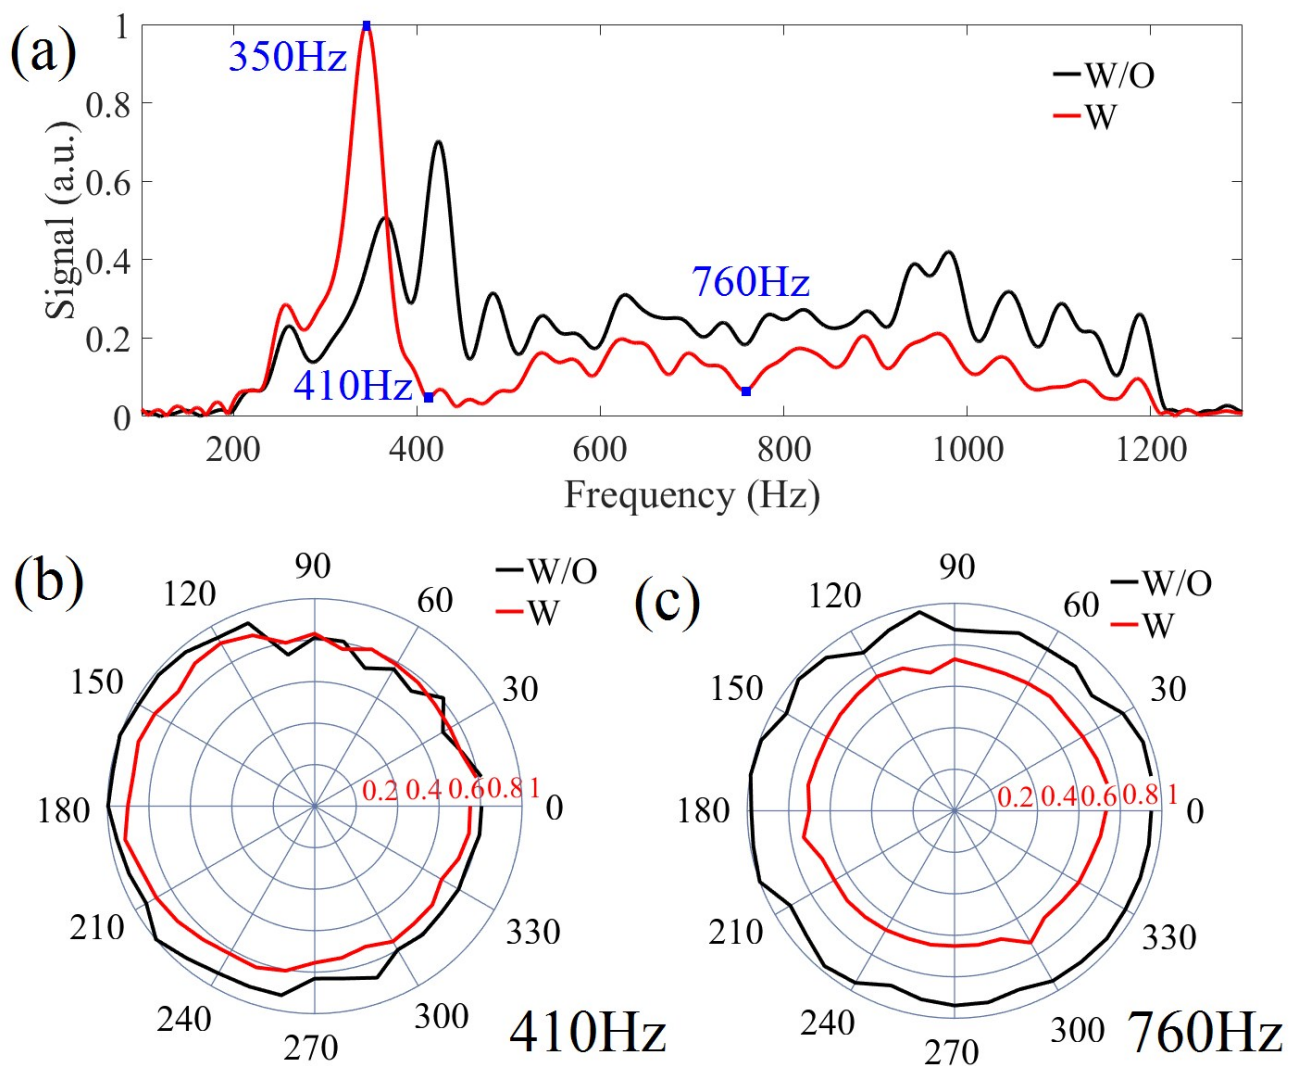

**Supplementary Figure 4. Spectral of cases with/without Ball-2 sample and focusing directivity.** (a) Spectral of the focus center (without sample) and the sample surface (with Ball-2 sample) for cases with or without sound absorber. The focusing effect at 410Hz (b) and 760Hz (c).
